# Supplementary material for: Rapid dielectric bistable switching materials without a time/temperature responsive blind area in the linarite-like type molecular large-size single crystals
Source: Royal Society of Chemistry journal article supplement (doi:10.1039/c6tc02166b), 2016-01-01
Supplement: c6tc02166b1.pdf [file c6tc02166b1.pdf]

## Rapid dielectric bistable switching materials without time/temperature responsive blind area in the linarite-like type molecular large-size single crystals

*Cheng Chen, Wan-Ying Zhang, Heng-Yun Ye, Qiong Ye\*, Da-Wei Fu\**

**Table S1 Selected structural data for 1 under 293K**

| <i>Bond lengths / Å and bond angles / °</i> |           |               |           |        |
|---------------------------------------------|-----------|---------------|-----------|--------|
| Cd(1)-O(1)                                  | 2.234(3)  | Cd(1)-O(1)#1  | 2.234(3)  |        |
| Cd(1)-O(1)#2                                | 2.234(3)  | Cd(1)-O(1)#3  | 2.234(3)  |        |
| Cd(1)-Cl(1)#4                               | 2.6260(6) | Cd(1)-Cl(1)#1 | 2.6260(6) |        |
| Cd(1)-Cl(1)#5                               | 2.6260(6) | Cd(1)-Cl(1)   | 2.6260(6) |        |
| Cl(1)-Cd(1)#7                               | 2.6260(6) | S(1)-O(1)#4   | 1.492(4)  |        |
| S(1)-O(2)                                   | 1.401(2)  | S(1)-O(2)#4   | 1.401(2)  |        |
| S(1)-O(1)#3                                 | 1.492(4)  | S(1)-O(1)     | 1.492(4)  |        |
| S(1)-O(1)#6                                 | 1.492(4)  |               |           |        |
| <i>Hydrogen bonds / Å and °</i>             |           |               |           |        |
| D-H...A                                     | d(D-H)    | d(H...A)      | d(D...A)  | <(DHA) |
| N(1)-H(1C)...O(2)#8                         | 0.89      | 1.82          | 2.637(3)  | 151.7  |

Symmetry transformations used to generate equivalent atoms: #1 -x+1,-y+1,-z  
 #2 x,-y+1,-z #3 -x+1,y,z #4 -x+1,y,-z+1/2 #5 x,-y+1,z-1/2 #6 x,y,-z+1/2  
 #7 -x+1,-y+1,z+1/2 #8 x-1/2,y-1/2,z

**Table S2 Selected structural data for 1 under 193k**

---

*Bond lengths / Å and bond angles / °*

---

|                   |            |                    |            |
|-------------------|------------|--------------------|------------|
| Cd(1)-O(2)        | 2.269(3)   | Cd(1)-O(2)#1       | 2.269(3)   |
| Cd(1)-Cl(1)       | 2.6287(15) | Cd(1)-Cl(1)#1      | 2.6287(15) |
| Cd(1)-Cl(2)       | 2.6348(14) | Cd(1)-Cl(2)#1      | 2.6348(14) |
| Cl(2)-Cd(1)#2     | 2.6348(14) | Cl(1)-Cd(1)#2      | 2.6287(15) |
| S(1)-O(3)         | 1.450(3)   | S(1)-O(2)#3        | 1.470(2)   |
| S(1)-O(2)         | 1.470(2)   | S(1)-O(1)          | 1.488(3)   |
| O(7)#2-Cl(1)-O(7) | 109.72(11) | O(7)#2-Cl(1)-O(10) | 108.94(7)  |
| O(7)-Cl(1)-O(10)  | 108.94(7)  | O(7)#2-Cl(1)-O(9)  | 109.86(4)  |

---

*Hydrogen bonds / Å and °*

---

| D-H...A             | d(D-H) | d(H...A) | d(D...A) | <(DHA) |
|---------------------|--------|----------|----------|--------|
| N(1)-H(1C)...O(3)#4 | 0.90   | 1.84     | 2.609(5) | 142.7  |
| N(2)-H(2C)...O(1)#5 | 0.90   | 1.78     | 2.648(5) | 159.9  |

---

Symmetry transformations used to generate equivalent atoms: #1 -x+1,-y,-z  
#2 -x+1,y+1/2,-z #3 x,-y+1/2,z #4 x+1/2,y,-z+1/2 #5 x+1/2,y,-z-1/2

**Table S3** Selected structural data for **2** under 293K

---

*Bond lengths / Å and bond angles / °*

---

|                     |            |                     |            |
|---------------------|------------|---------------------|------------|
| Cd(1)-O(1)          | 2.260(4)   | Cd(1)-O(1)#1        | 2.260(4)   |
| Cd(1)-O(1)#2        | 2.260(4)   | Cd(1)-O(1)#3        | 2.260(4)   |
| Cd(1)-Br(1)#4       | 2.7667(11) | Cd(1)-Br(1)#1       | 2.7667(11) |
| Cd(1)-Br(1)#5       | 2.7667(11) | Cd(1)-Br(1)         | 2.7667(11) |
| Br(1)-Cd(1)#7       | 2.7667(11) | S(1)-O(2)#4         | 1.448(3)   |
| S(1)-O(2)           | 1.448(3)   | S(1)-O(1)#2         | 1.457(4)   |
| S(1)-O(1)#6         | 1.457(4)   | S(1)-O(1)#4         | 1.457(4)   |
| S(1)-O(1)           | 1.457(4)   |                     |            |
| O(1)-Cd(1)-O(1)#1   | 180.0      | O(1)-Cd(1)-O(1)#2   | 6.2(5)     |
| O(1)#1-Cd(1)-O(1)#2 | 173.8(5)   | O(1)-Cd(1)-O(1)#3   | 173.8(5)   |
| O(1)#1-Cd(1)-O(1)#3 | 6.2(5)     | O(1)#2-Cd(1)-O(1)#3 | 180.00(19) |

---

*Hydrogen bonds / Å and °*

---

| D-H...A             | d(D-H) | d(H...A) | d(D...A) | <(DHA) |
|---------------------|--------|----------|----------|--------|
| N(1)-H(1C)...O(2)#8 | 0.89   | 1.82     | 2.637(3) | 151.7  |

---

**Table S4 Selected structural data for 2 under 223k**

---

*Bond lengths / Å and bond angles / °*

---

|               |            |               |            |
|---------------|------------|---------------|------------|
| Cd(1)-O(1)    | 2.257(11)  | Cd(1)-O(1)#1  | 2.257(11)  |
| Cd(1)-Br(1)#2 | 2.7554(17) | Cd(1)-Br(1)#3 | 2.7554(17) |
| Cd(1)-Br(1)#1 | 2.7554(17) | Cd(1)-Br(1)   | 2.7554(17) |
| Br(1)-Cd(1)#4 | 2.6348(14) |               |            |
| S(1)-O(2)     | 1.439(12)  | S(1)-O(2)#2   | 1.439(12)  |
| S(1)-O(1)     | 1.460(12)  | S(1)-O(1)#5   | 1.460(12)  |

---

O(7)#1-Cl(1)-O(1) 180.0

---

*Hydrogen bonds / Å and °*

---

| D-H...A             | d(D-H) | d(H...A) | d(D...A) | <(DHA) |
|---------------------|--------|----------|----------|--------|
| N(1)-H(1C)...O(2)#8 | 0.99   | 1.71     | 2.64(2)  | 154.6  |

---

Symmetry transformations used to generate equivalent atoms: #1 -x,-y+1,-z+1  
#2 -x,y,z #3 x,-y+1,-z+1 #4 -x,-y+1,z-1/2 #5 x,y,-z+3/2 #6 x,y,-z+1/2  
#7 -x+1,y,z #8 -x+1,-y+1,-z+1

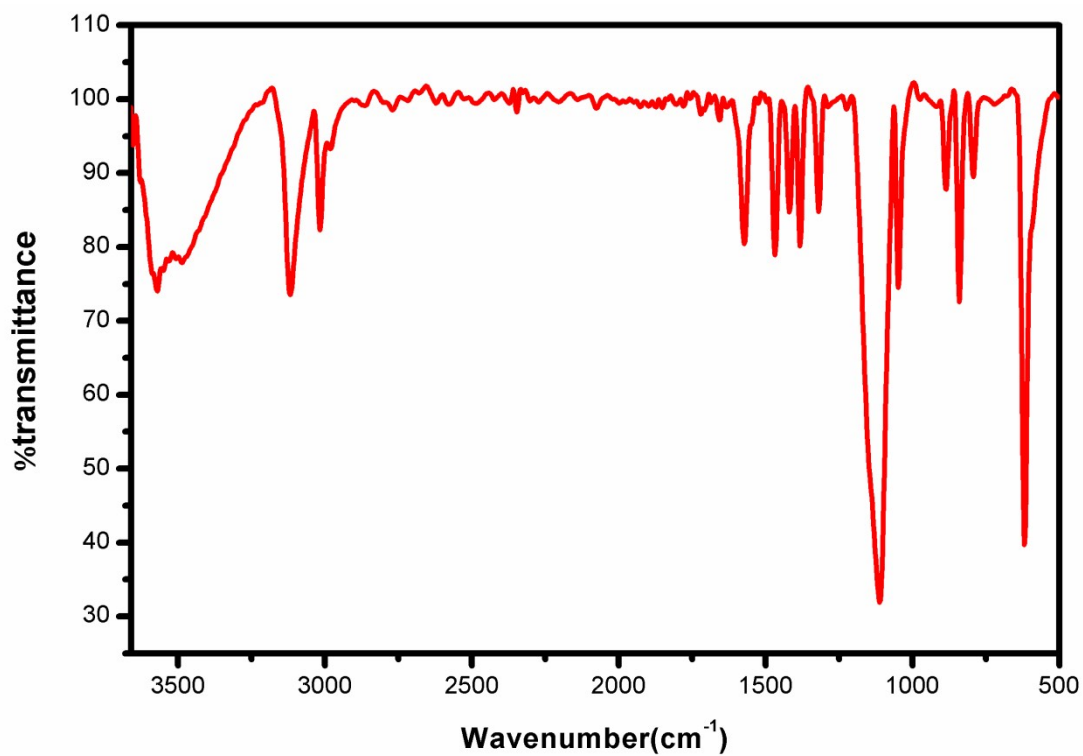

Fig.S1 The IR spectrum for compound 1

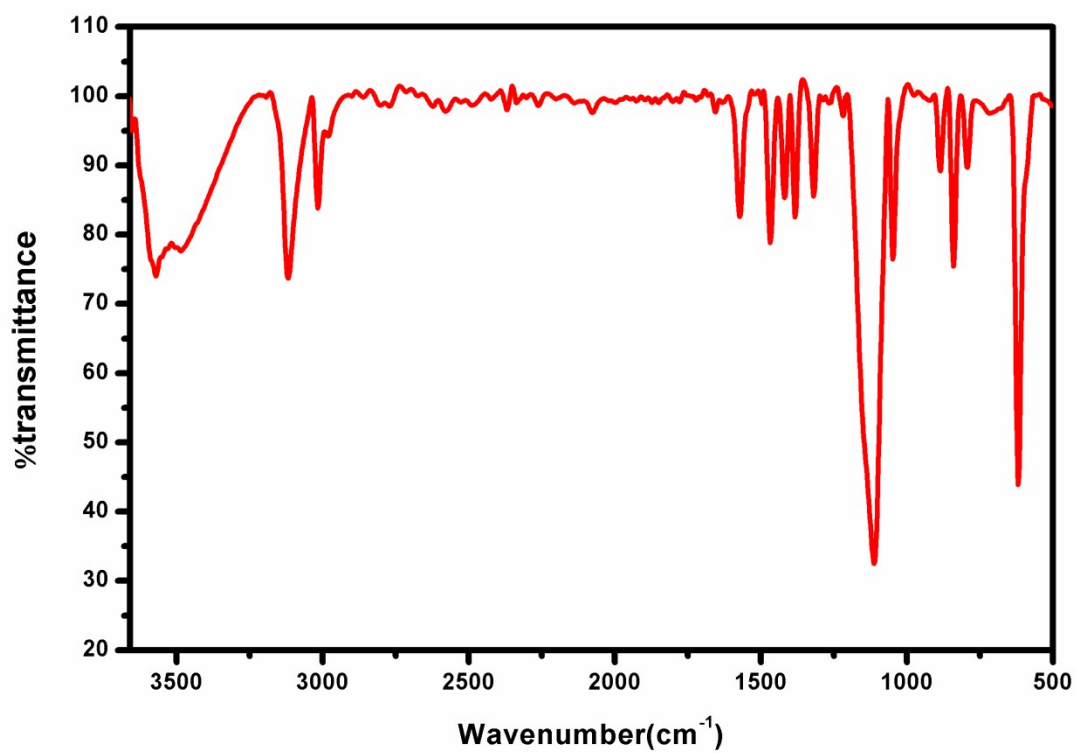

Fig.S2 The IR spectrum for compound 2

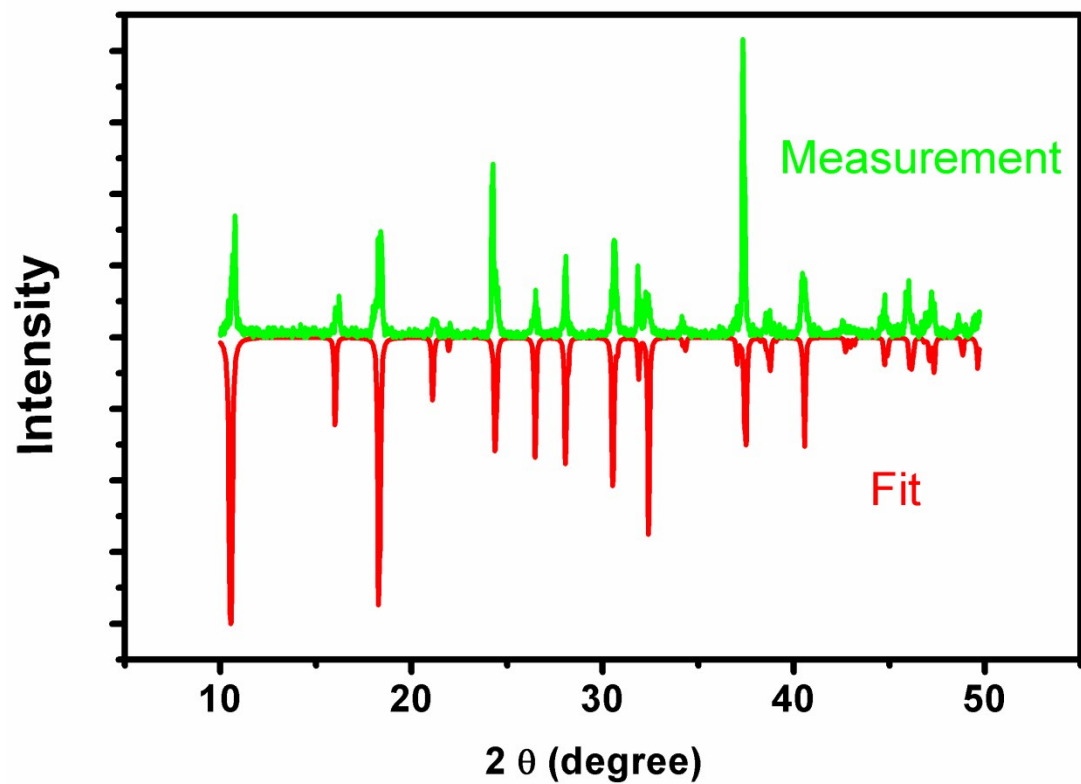

Fig.S3 The powder X-ray diffraction (PXRD) pattern for compound 1

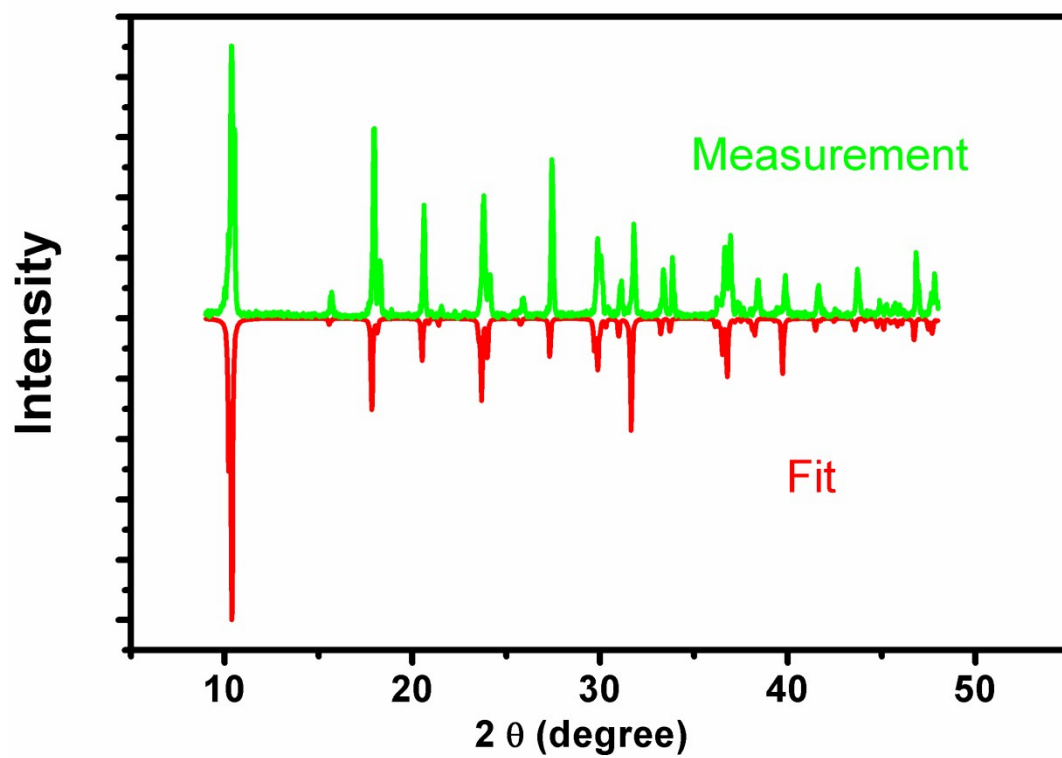

Fig.S4 The powder X-ray diffraction (PXRD) pattern for compound 2

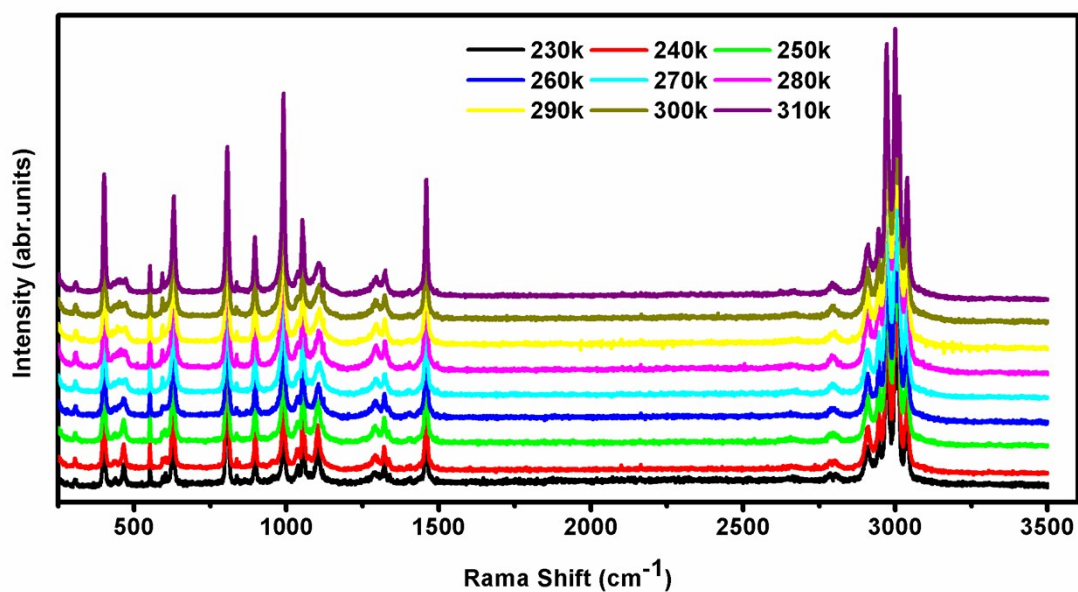

Fig.S5 Raman spectra of compound 1 at various temperatures in the 250-3500  $\text{cm}^{-1}$  spectral ranges.

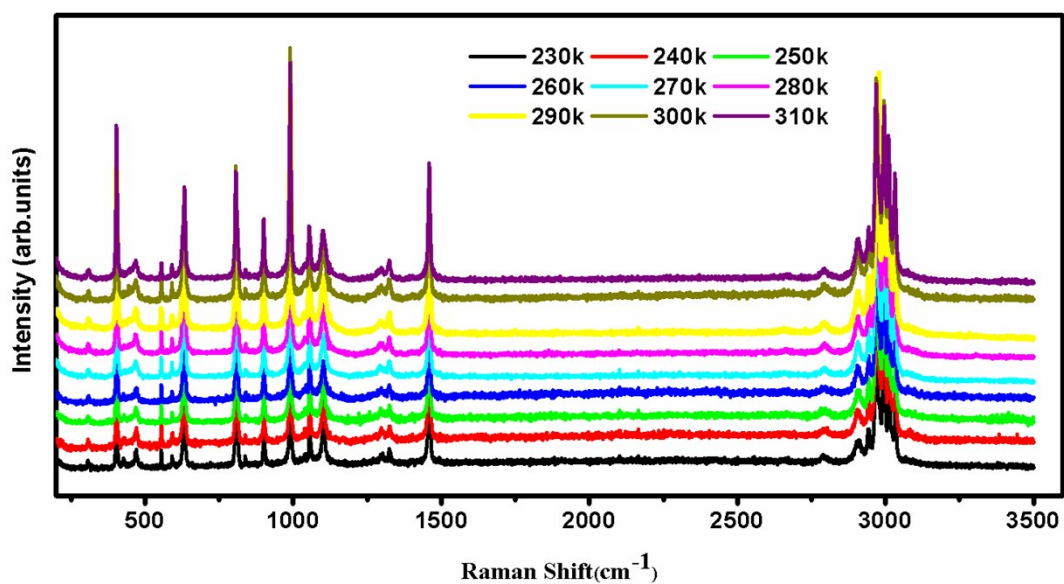

Fig.S6 Raman spectra of compound 2 at various temperatures in the 250-3500  $\text{cm}^{-1}$  spectral ranges.
